# Supplementary material for: Factorial Validity of the German KABC-II at Ages 7 to 12 in a Clinical Sample: Four Factors Fit Better than Five
Source: MDPI journal article supplement (doi:10.3390/jintelligence11070148), 2023-07-22
Supplement: s1 [file s1]

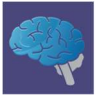

*Article*

# Factorial Validity of the German KABC-II at Ages 7 to 12 in a Clinical Sample: Four Factors Fit Better than Five

Gerolf Renner <sup>1,\*</sup>, Anne Schroeder <sup>2</sup> and Dieter Irblich <sup>3,†</sup>

<sup>1</sup> Ludwigsburg University of Education, 71634 Ludwigsburg, Germany

<sup>2</sup> Werner Otto Institute, 22337 Hamburg, Germany

<sup>2</sup> formerly Social Pediatric Center kreuznacher diakonie, 55469 Simmern, Germany

\* Correspondence: renner@ph-ludwigsburg.de

† Current address: Private Psychotherapeutic Practice, 55469 Simmern, Germany

## Supplementary Materials

**Table S1.** Descriptive statistics for KABC-II subtests, scales, and global scales

**Table S2.** Intercorrelations of KABC-II core subtests

**Table S3.** Standard second order CHC model: Loadings of first-order factors on the general factor and implied correlations of first-order factors for core subtests with and without time points



**Table S1.** Descriptive statistics for KABC-II subtests, scales, and global scales

|                          | Mean  | SD    | Skewness | Kurtosis |
|--------------------------|-------|-------|----------|----------|
| Story Completion         | 7.69  | 3.30  | 0.18     | -0.50    |
| Pattern Reasoning        | 8.74  | 2.96  | 0.12     | 0.47     |
| Rover                    | 8.91  | 3.34  | 0.14     | -0.75    |
| Triangles                | 7.52  | 2.86  | -0.10    | -0.16    |
| Riddles                  | 9.03  | 3.19  | -0.29    | 0.01     |
| Verbal Knowledge         | 8.39  | 3.16  | 0.06     | 0.20     |
| Number Recall            | 7.58  | 2.97  | 0.15     | -0.03    |
| Word Order               | 8.50  | 3.06  | 0.25     | 0.06     |
| Atlantis                 | 9.01  | 3.05  | -0.08    | 0.73     |
| Rebus                    | 8.10  | 3.01  | 0.08     | -0.26    |
| Planning/Gf              | 89.39 | 16.88 | -0.13    | 0.24     |
| Simultaneous/Gv          | 92.39 | 15.04 | 0.05     | 0.62     |
| Knowledge/Gc             | 92.74 | 16.50 | -0.30    | 1.34     |
| Sequential/Gsm           | 88.68 | 15.75 | -0.01    | 0.24     |
| Learning/Glr             | 90.28 | 15.39 | -0.14    | 0.08     |
| Fluid-Crystallized Index | 88.24 | 14.34 | 0.16     | 0.39     |
| Mental Processing Index  | 87.75 | 14.33 | 0.14     | 0.37     |

**Table S2.** Intercorrelations of KABC-II core subtests

1

|                           | Story Completion |                | Pattern Reasoning |                | Rover | Triangles   |                | Riddles | Verbal Knowledge | Number Recall | Word Order | Atlantis |
|---------------------------|------------------|----------------|-------------------|----------------|-------|-------------|----------------|---------|------------------|---------------|------------|----------|
|                           | time points      | no time points | time points       | no time points |       | time points | no time points |         |                  |               |            |          |
| Story Completion (no tp)  | .93              |                |                   |                |       |             |                |         |                  |               |            |          |
| Pattern Reasoning (tp)    | .61              | .58            |                   |                |       |             |                |         |                  |               |            |          |
| Pattern Reasoning (no tp) | .58              | .58            | .96               |                |       |             |                |         |                  |               |            |          |
| Rover                     | .40              | .41            | .51               | .53            |       |             |                |         |                  |               |            |          |
| Triangles (tp)            | .52              | .49            | .61               | .59            | .52   |             |                |         |                  |               |            |          |
| Triangles (no tp)         | .51              | .50            | .61               | .59            | .50   | .95         |                |         |                  |               |            |          |
| Riddles                   | .53              | .52            | .51               | .52            | .38   | .42         | .43            |         |                  |               |            |          |
| Verbal Knowledge          | .53              | .52            | .49               | .50            | .37   | .44         | .44            | .77     |                  |               |            |          |
| Number Recall             | .33              | .35            | .40               | .39            | .32   | .32         | .32            | .42     | .37              |               |            |          |
| Word Order                | .37              | .39            | .43               | .42            | .33   | .33         | .34            | .50     | .45              | .69           |            |          |
| Atlantis                  | .42              | .42            | .39               | .40            | .26   | .34         | .34            | .42     | .41              | .36           | .43        |          |
| Rebus                     | .39              | .40            | .44               | .42            | .30   | .40         | .39            | .40     | .39              | .31           | .41        | .52      |

*Note.* All correlations are significant with  $p < .001$ . tp = time points

2

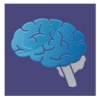

**Table S3.** Standard second order CHC model: Loadings of first-order factors on the general factor and implied correlations of first-order factors for core subtests with and without time points

| Factor | g    | Gf   | Gv   | Gc   | Gsm  | Glr  |
|--------|------|------|------|------|------|------|
| g      | ---  | 0.96 | 0.88 | 0.77 | 0.66 | 0.77 |
| Gf     | 0.98 | ---  | 0.85 | 0.75 | 0.64 | 0.75 |
| Gv     | 0.88 | 0.87 | ---  | 0.68 | 0.58 | 0.68 |
| Gc     | 0.78 | 0.77 | 0.69 | ---  | 0.51 | 0.60 |
| Gsm    | 0.67 | 0.66 | 0.59 | 0.52 | ---  | 0.51 |
| Glr    | 0.77 | 0.76 | 0.68 | 0.61 | 0.52 | ---  |

*Note.* Values are based on model 2 with time points (above the diagonal) and without time points (below the diagonal).
